# Supplementary material for: Impact of cannabis use on brain metabolism using 31P and 1H magnetic resonance spectroscopy
Source: Springer Nature journal article supplement (doi:10.1007/s00234-023-03220-y), 2023-09-22
Supplement: MOESM1 [file 234_2023_3220_MOESM1_ESM.pdf]

# Impact of cannabis use on brain metabolism using <sup>31</sup>P and <sup>1</sup>H magnetic resonance spectroscopy

Maximilian Fenzl<sup>1</sup> (ORCID 0000-0003-1011-2754) · Martin Backens<sup>1</sup> (ORCID 0000-0002-3414-696X) · Silviu Bodea<sup>2</sup> · Miriam Wittemann<sup>3</sup> · Florian Werler<sup>4</sup> · Jule Brielmaier<sup>5</sup> · Robert Christian Wolf<sup>4</sup> (ORCID 0000-0002-5358-5212) · Wolfgang Reith<sup>1</sup>

1. Institute of Neuroradiology, Saarland University, 66421 Homburg, Germany
2. Helmholtz Zentrum Munich, German Research Center for Environmental Health Institute of Biological and Medical Imaging, 85748 Munich, Germany
3. Department of Psychiatry and Psychotherapy, Saarland University, 66421 Homburg, Germany
4. Department of General Psychiatry at the Center for Psychosocial Medicine, Heidelberg University, 69115 Heidelberg, Germany
5. Department of Obstetrics and Gynecology, RKH Clinic Ludwigsburg, 71640 Ludwigsburg, Germany

**Suppl\_Table1: Demographics**

| Demographics and clinical scores | fN percentile |        |      | mN percentile |        |      | mC percentile |        |      | p value ΔCN  |
|----------------------------------|---------------|--------|------|---------------|--------|------|---------------|--------|------|--------------|
|                                  | 25            | median | 75   | 25            | median | 75   | 25            | median | 75   |              |
| number of subjects               | 21            |        |      | 26            |        |      | 40            |        |      |              |
| Age, years                       | 21.7          | 22.9   | 23.8 | 23.3          | 24.6   | 26.5 | 21.2          | 23.1   | 25.7 | 0.172        |
| Years of education               | 12.0          | 13.0   | 16.0 | 12.0          | 12.8   | 16.5 | 12.0          | 13.0   | 15.8 | 0.991        |
| Tobacco use, py                  | 0.0           | 0.0    | 0.0  | 0.0           | 0.0    | 0.0  | 0.0           | 1.2    | 5.0  | <b>0.001</b> |
| BDI                              | 1.0           | 3.0    | 5.0  | 0.0           | 2.0    | 4.0  | 1.5           | 4.0    | 8.0  | 0.143        |
| CUDIT                            |               |        |      |               |        |      | 8.5           | 12.0   | 18.5 |              |
| Duration of use, years           |               |        |      |               |        |      | 0.0           | 2.0    | 4.5  |              |
| Onset use, age                   |               |        |      |               |        |      | 15.8          | 17.8   | 20.0 |              |
| lifetime joints (x1000)          |               |        |      |               |        |      | 0.4           | 1.0    | 5.5  |              |
| Current use, days/week           |               |        |      |               |        |      | 1.50          | 4.0    | 7.00 |              |
| Current use, g/week              |               |        |      |               |        |      | 0.33          | 2.6    | 5.25 |              |

Tobacco py: number of packs of cigarettes smoked per day multiplied by the number of years the person has smoked

BDI: Beck depression inventory

CUDIT: Cannabis use identification test

p-values resulting from Mann-Whitney U test between mN and mC groups (ΔCN). p-values < 0.05 are marked in bold.

Demographics and clinical assessment scores of study subjects
