# Supplementary material for: Impact of cannabis use on brain metabolism using 31P and 1H magnetic resonance spectroscopy
Source: Springer Nature journal article supplement (doi:10.1007/s00234-023-03220-y), 2023-09-22
Supplement: MOESM2 [file 234_2023_3220_MOESM2_ESM.pdf]

# Impact of cannabis use on brain metabolism using $^{31}\text{P}$ and $^1\text{H}$ magnetic resonance spectroscopy

Maximilian Fenzl<sup>1</sup> (ORCID 0000-0003-1011-2754) · Martin Backens<sup>1</sup> (ORCID 0000-0002-3414-696X) · Silviu Bodea<sup>2</sup> · Miriam Wittemann<sup>3</sup> · Florian Werler<sup>4</sup> · Jule Brielmaier<sup>5</sup> · Robert Christian Wolf<sup>4</sup> (ORCID 0000-0002-5358-5212) · Wolfgang Reith<sup>1</sup>

1. Institute of Neuroradiology, Saarland University, 66421 Homburg, Germany
2. Helmholtz Zentrum Munich, German Research Center for Environmental Health Institute of Biological and Medical Imaging, 85748 Munich, Germany
3. Department of Psychiatry and Psychotherapy, Saarland University, 66421 Homburg, Germany
4. Department of General Psychiatry at the Center for Psychosocial Medicine, Heidelberg University, 69115 Heidelberg, Germany
5. Department of Obstetrics and Gynecology, RKH Clinic Ludwigsburg, 71640 Ludwigsburg, Germany

### Suppl\_Fig1: Voxel placement for Phosphorus MRS

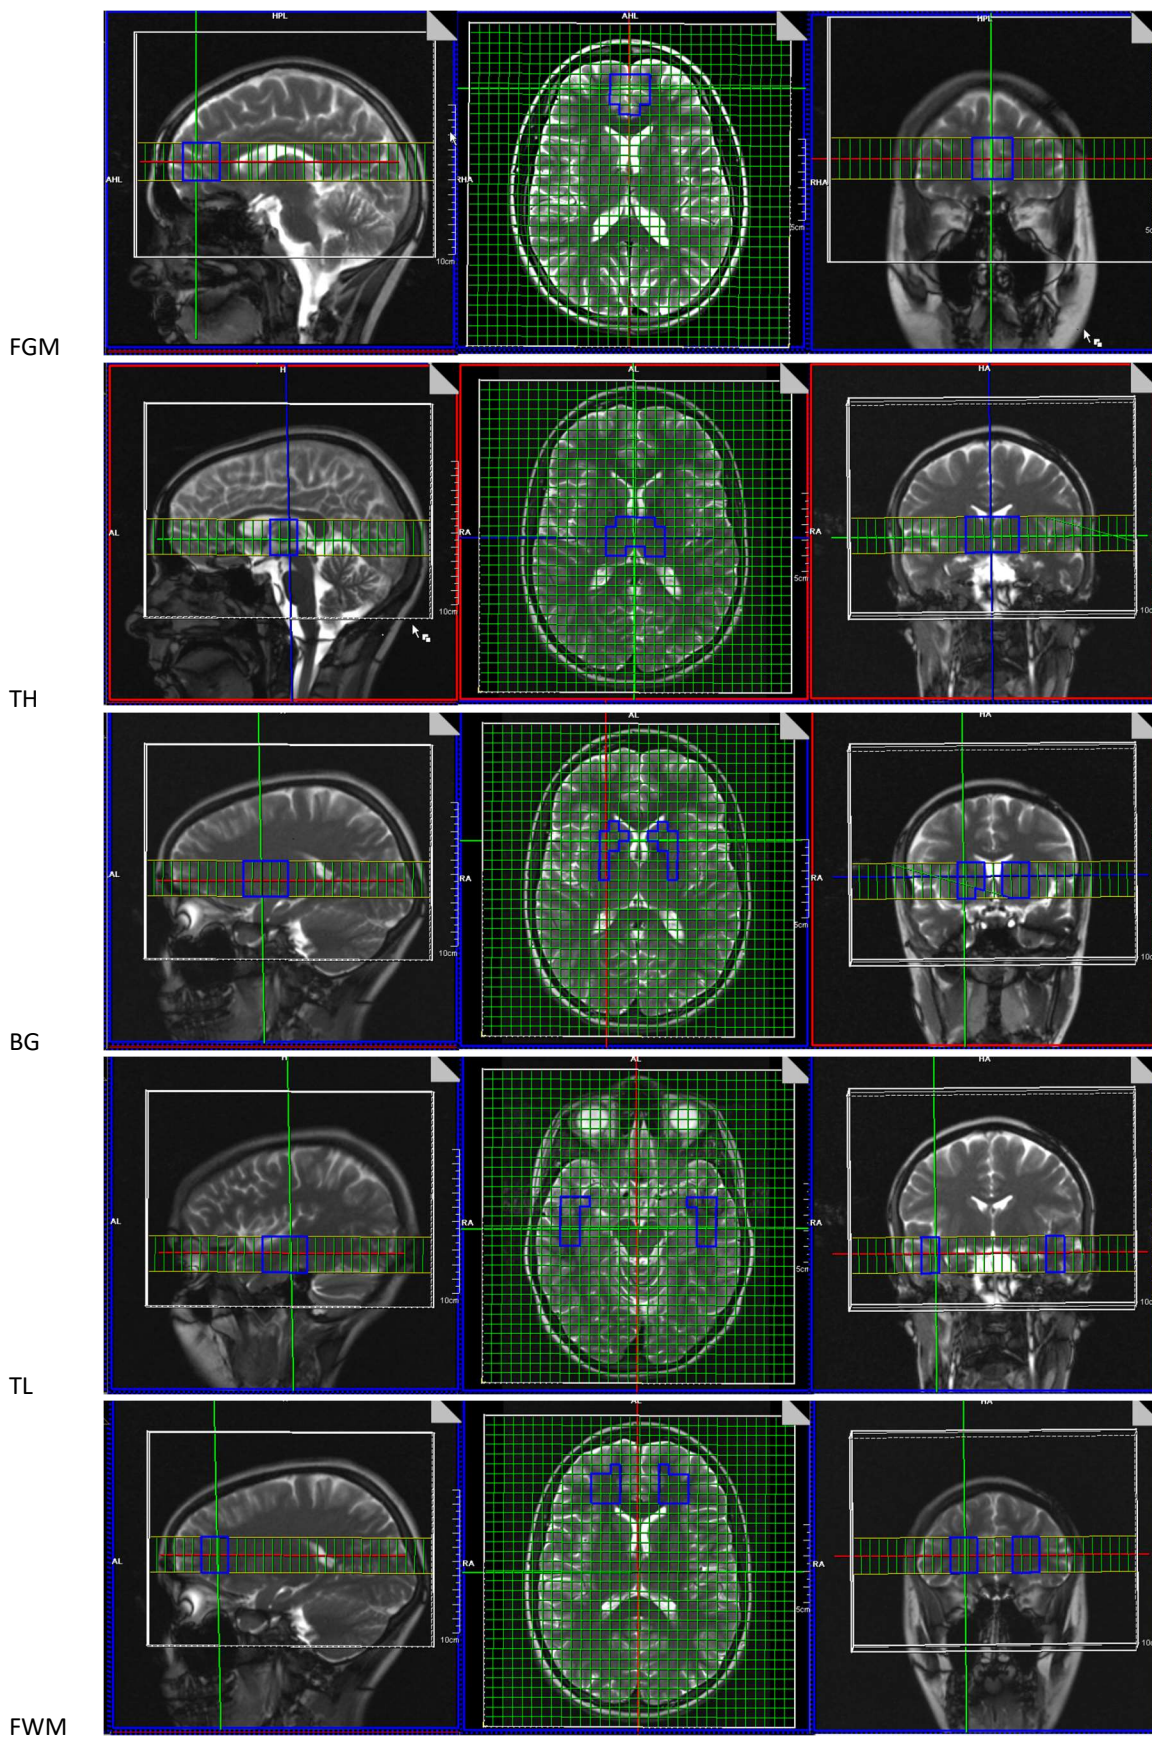

Graphical examples of voxel placement for Phosphorus MRS for each VOI of the right and left hemisphere

## Suppl\_Fig2: Evaluation of Phosphorus Spectra – examples

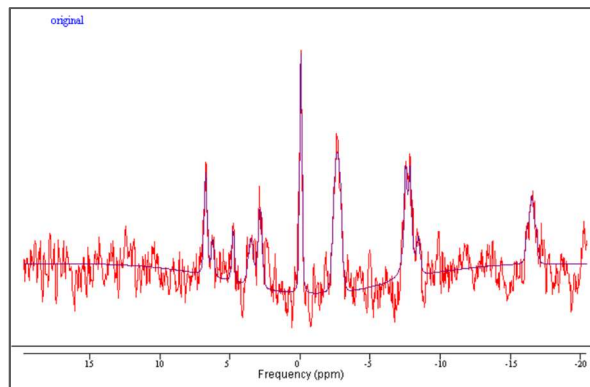

FGM

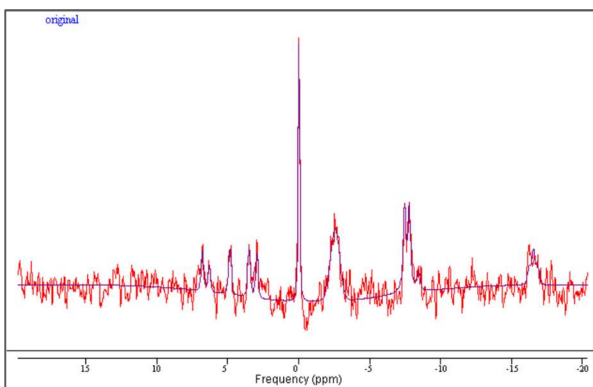

r\_TH

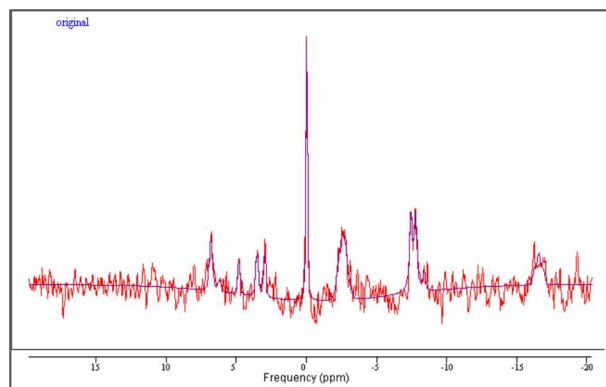

I\_TH

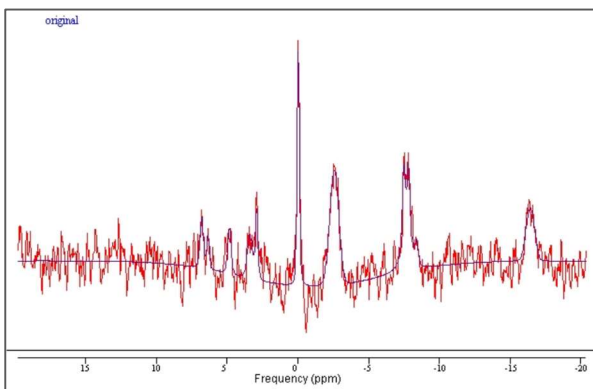

r\_BG

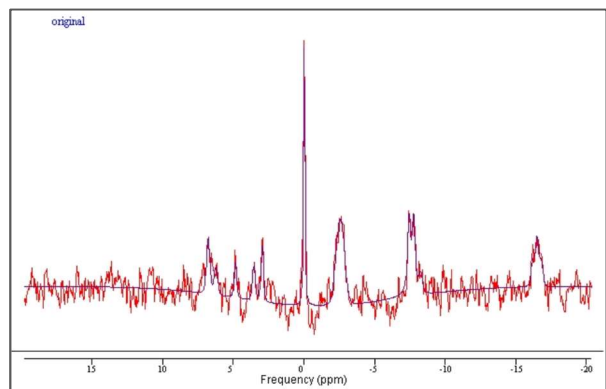

I\_BG

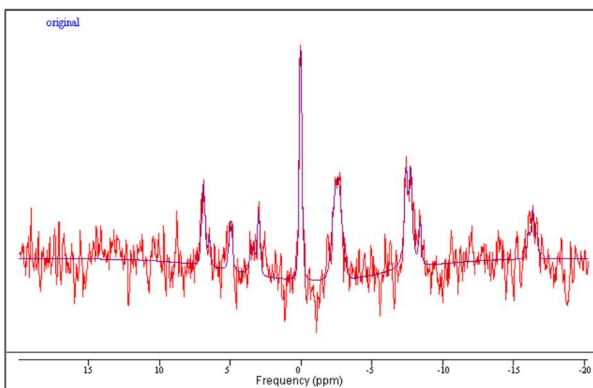

r\_TL

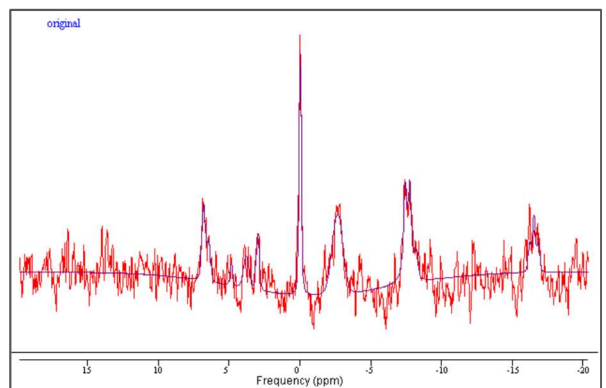

I\_TL

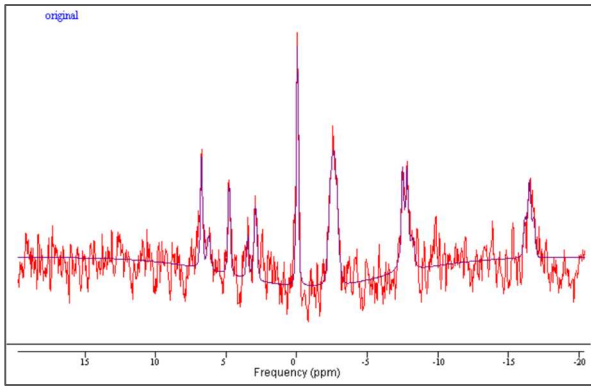

r\_FWM

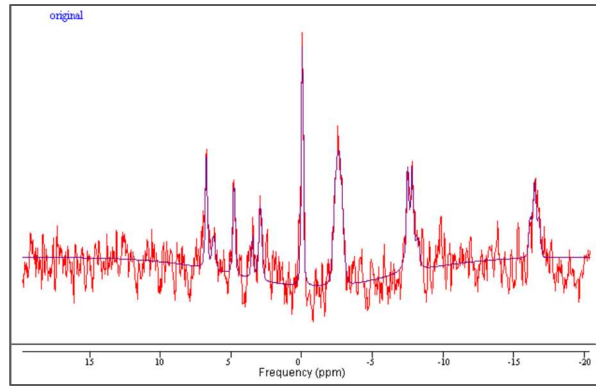

l\_FWM

Representative phosphorus spectra from each VOI of the right and left hemisphere with metabolite fit using AMARES (jmrui software)

Suppl\_Table2: Phosphorus MRS Data Quality – spreadsheet

|           | voxel size (ml) - right |            |            |
|-----------|-------------------------|------------|------------|
| mean ± SD | fN                      | mN         | mC         |
| FGM       | 15.9 ± 2.4              | 15.8 ± 2.3 | 15.8 ± 2.2 |
| r_TH      | 10.7 ± 0.8              | 10.9 ± 0.7 | 10.7 ± 0.9 |
| r_BG      | 10.7 ± 0.8              | 10.4 ± 0.6 | 10.7 ± 0.8 |
| r_TL      | 12.1 ± 0.3              | 12.2 ± 0.7 | 12.3 ± 0.6 |
| r_FWM     | 9.6 ± 1.1               | 9.6 ± 1.0  | 9.5 ± 1.0  |

|           | voxel size (ml) - left |            |            |
|-----------|------------------------|------------|------------|
| mean ± SD | fN                     | mN         | mC         |
| FGM       | 15.9 ± 2.4             | 15.8 ± 2.3 | 15.8 ± 2.2 |
| l_TH      | 10.7 ± 0.7             | 11.0 ± 0.7 | 10.9 ± 0.7 |
| l_BG      | 10.6 ± 0.9             | 10.3 ± 0.7 | 10.7 ± 0.9 |
| l_TL      | 12.0 ± 0.3             | 12.1 ± 0.6 | 12.3 ± 0.6 |
| l_FWM     | 9.5 ± 1.1              | 9.5 ± 0.9  | 9.5 ± 0.9  |

|           | SNR - right |            |            |
|-----------|-------------|------------|------------|
| mean ± SD | fN          | mN         | mC         |
| FGM       | 5.1 ± 2.3   | 5.0 ± 1.8  | 4.5 ± 1.6  |
| r_TH      | 11.8 ± 4.4  | 13.3 ± 3.3 | 12.1 ± 4.2 |
| r_BG      | 8.3 ± 3.0   | 9.2 ± 2.8  | 8.4 ± 2.9  |
| r_TL      | 6.9 ± 1.7   | 8.0 ± 2.2  | 7.3 ± 2.1  |
| r_FWM     | 4.9 ± 1.7   | 5.9 ± 1.6  | 4.8 ± 1.2  |

|           | SNR - left |            |            |
|-----------|------------|------------|------------|
| mean ± SD | fN         | mN         | mC         |
| FGM       | 5.1 ± 2.3  | 5.0 ± 1.8  | 4.5 ± 1.6  |
| l_TH      | 12.4 ± 4.0 | 13.6 ± 2.7 | 12.7 ± 4.2 |
| l_BG      | 9.8 ± 3.8  | 9.9 ± 2.6  | 9.3 ± 3.2  |
| l_TL      | 7.2 ± 1.9  | 8.4 ± 2.3  | 7.5 ± 2.2  |
| l_FWM     | 4.9 ± 1.4  | 5.9 ± 1.8  | 5.0 ± 1.3  |

|           | PCr line width - right |            |            |
|-----------|------------------------|------------|------------|
| mean ± SD | fN                     | mN         | mC         |
| FGM       | 14.6 ± 4.1             | 14.4 ± 4.1 | 14.3 ± 3.6 |
| r_TH      | 8.3 ± 2.6              | 6.9 ± 1.4  | 7.5 ± 1.9  |
| r_BG      | 11.0 ± 2.5             | 9.6 ± 2.5  | 10.4 ± 3.0 |
| r_TL      | 8.6 ± 1.7              | 8.6 ± 1.9  | 8.2 ± 1.6  |
| r_FWM     | 15.7 ± 3.3             | 13.4 ± 3.5 | 15.4 ± 2.9 |

|           | PCr line width - left |            |            |
|-----------|-----------------------|------------|------------|
| mean ± SD | fN                    | mN         | mC         |
| FGM       | 14.6 ± 4.1            | 14.4 ± 4.1 | 14.3 ± 3.6 |
| l_TH      | 8.2 ± 2.2             | 7.2 ± 1.5  | 7.5 ± 1.7  |
| l_BG      | 10.9 ± 3.3            | 10.3 ± 2.0 | 10.0 ± 2.0 |
| l_TL      | 12.1 ± 2.7            | 11.9 ± 2.5 | 12.9 ± 3.0 |
| l_FWM     | 16.3 ± 3.3            | 14.0 ± 3.2 | 14.4 ± 3.2 |

Mean values and standard deviation of voxel size, SNR and PCr line width of phosphorus spectra in each VOI of the right and left hemisphere for the three subject groups

Suppl\_Fig3: Phosphorus MRS Data Quality – bar plot

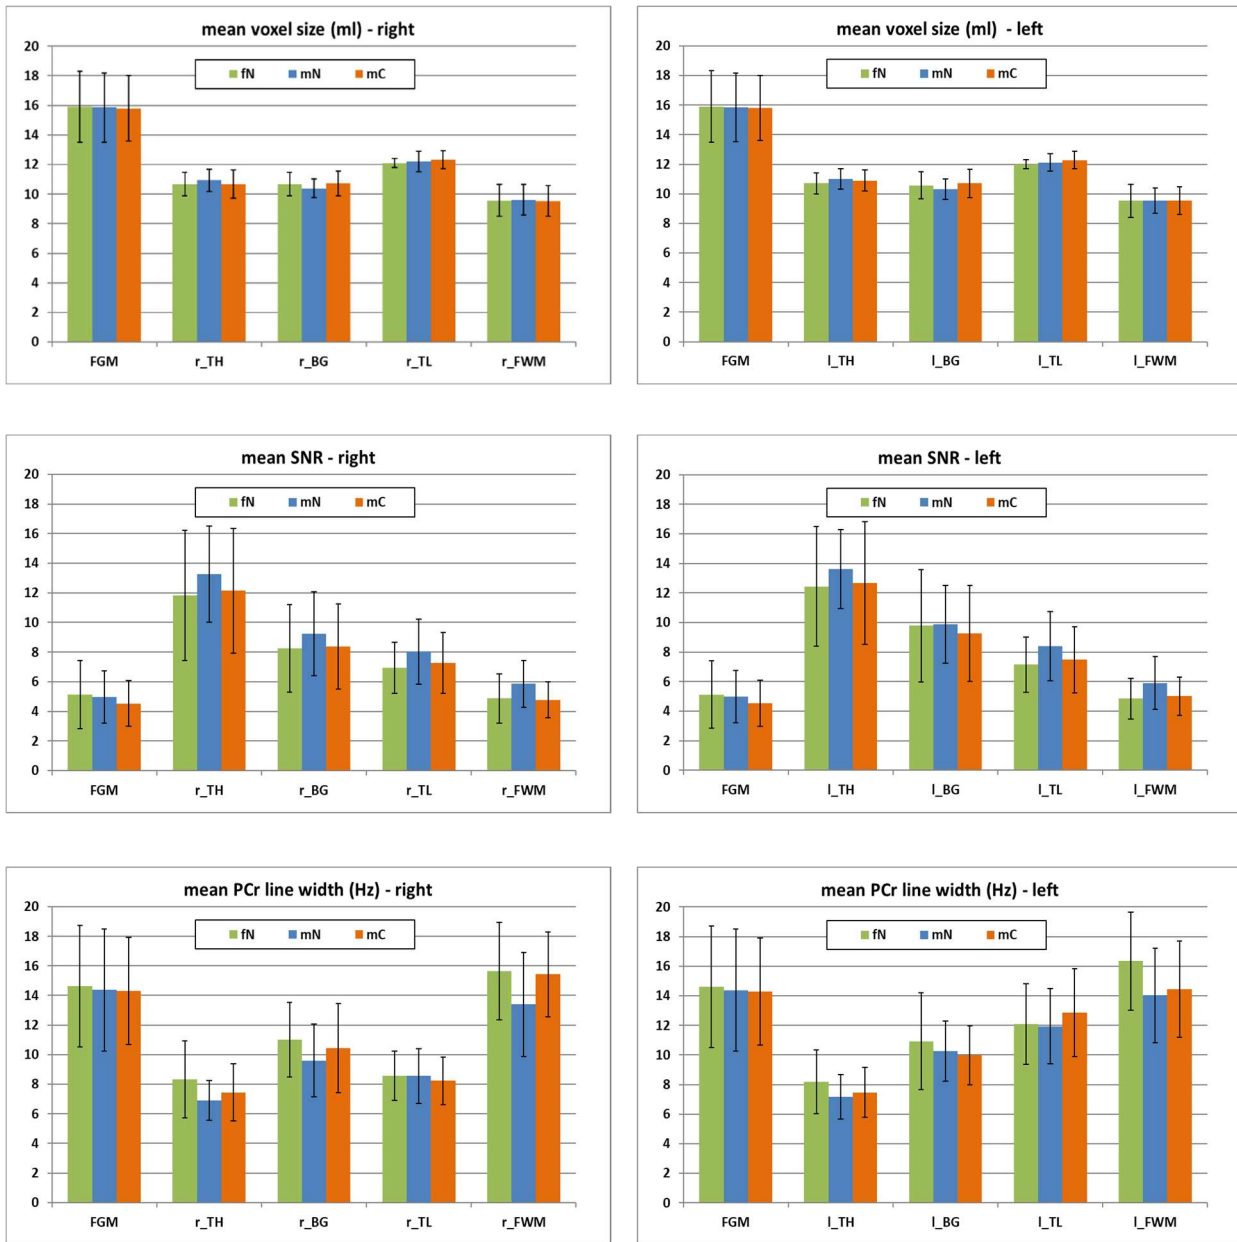

Comparison of mean values of voxel size, SNR and PCr line width of phosphorus spectra in each VOI of the right and left hemisphere for the three subject groups

Suppl\_Fig4: Phosphorus MRS Data Quality – box plot

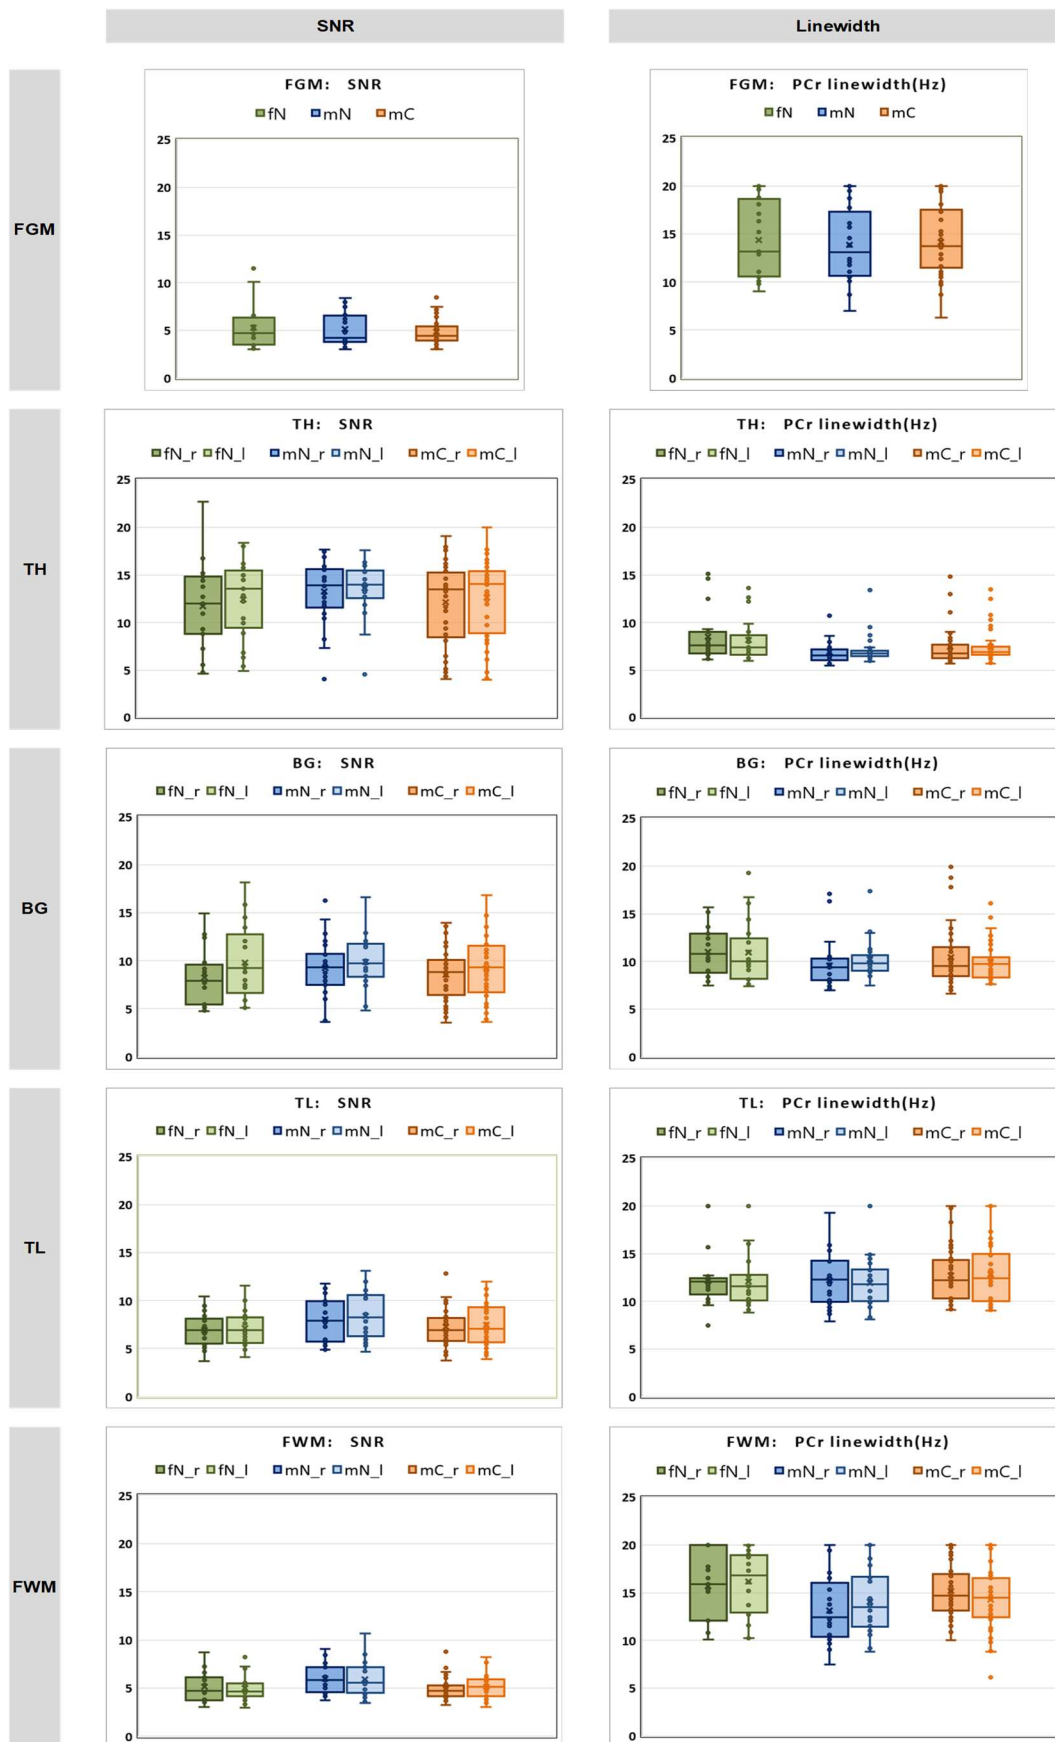

Box plots describing the variation of SNR and PCr line width of phosphorus spectra in each VOI of the right and left hemisphere for the three subject groups
