# Supplementary material for: Impact of cannabis use on brain metabolism using 31P and 1H magnetic resonance spectroscopy
Source: Springer Nature journal article supplement (doi:10.1007/s00234-023-03220-y), 2023-09-22
Supplement: MOESM3 [file 234_2023_3220_MOESM3_ESM-1.pdf]

# Impact of cannabis use on brain metabolism using $^{31}\text{P}$ and $^1\text{H}$ magnetic resonance spectroscopy

Maximilian Fenzl<sup>1</sup> (ORCID 0000-0003-1011-2754) · Martin Backens<sup>1</sup> (ORCID 0000-0002-3414-696X) · Silviu Bodea<sup>2</sup> · Miriam Wittemann<sup>3</sup> · Florian Werler<sup>4</sup> · Jule Brielmaier<sup>5</sup> · Robert Christian Wolf<sup>6</sup> (ORCID 0000-0002-5358-5212) · Wolfgang Reith<sup>1</sup>

1. Institute of Neuroradiology, Saarland University, 66421 Homburg, Germany
2. Helmholtz Zentrum Munich, German Research Center for Environmental Health Institute of Biological and Medical Imaging, 85748 Munich, Germany
3. Department of Psychiatry and Psychotherapy, Saarland University, 66421 Homburg, Germany
4. Department of General Psychiatry at the Center for Psychosocial Medicine, Heidelberg University, 69115 Heidelberg, Germany
5. Department of Obstetrics and Gynecology, RKH Clinic Ludwigsburg, 71640 Ludwigsburg, Germany

Suppl\_Fig5: Voxel placement for Proton MRS

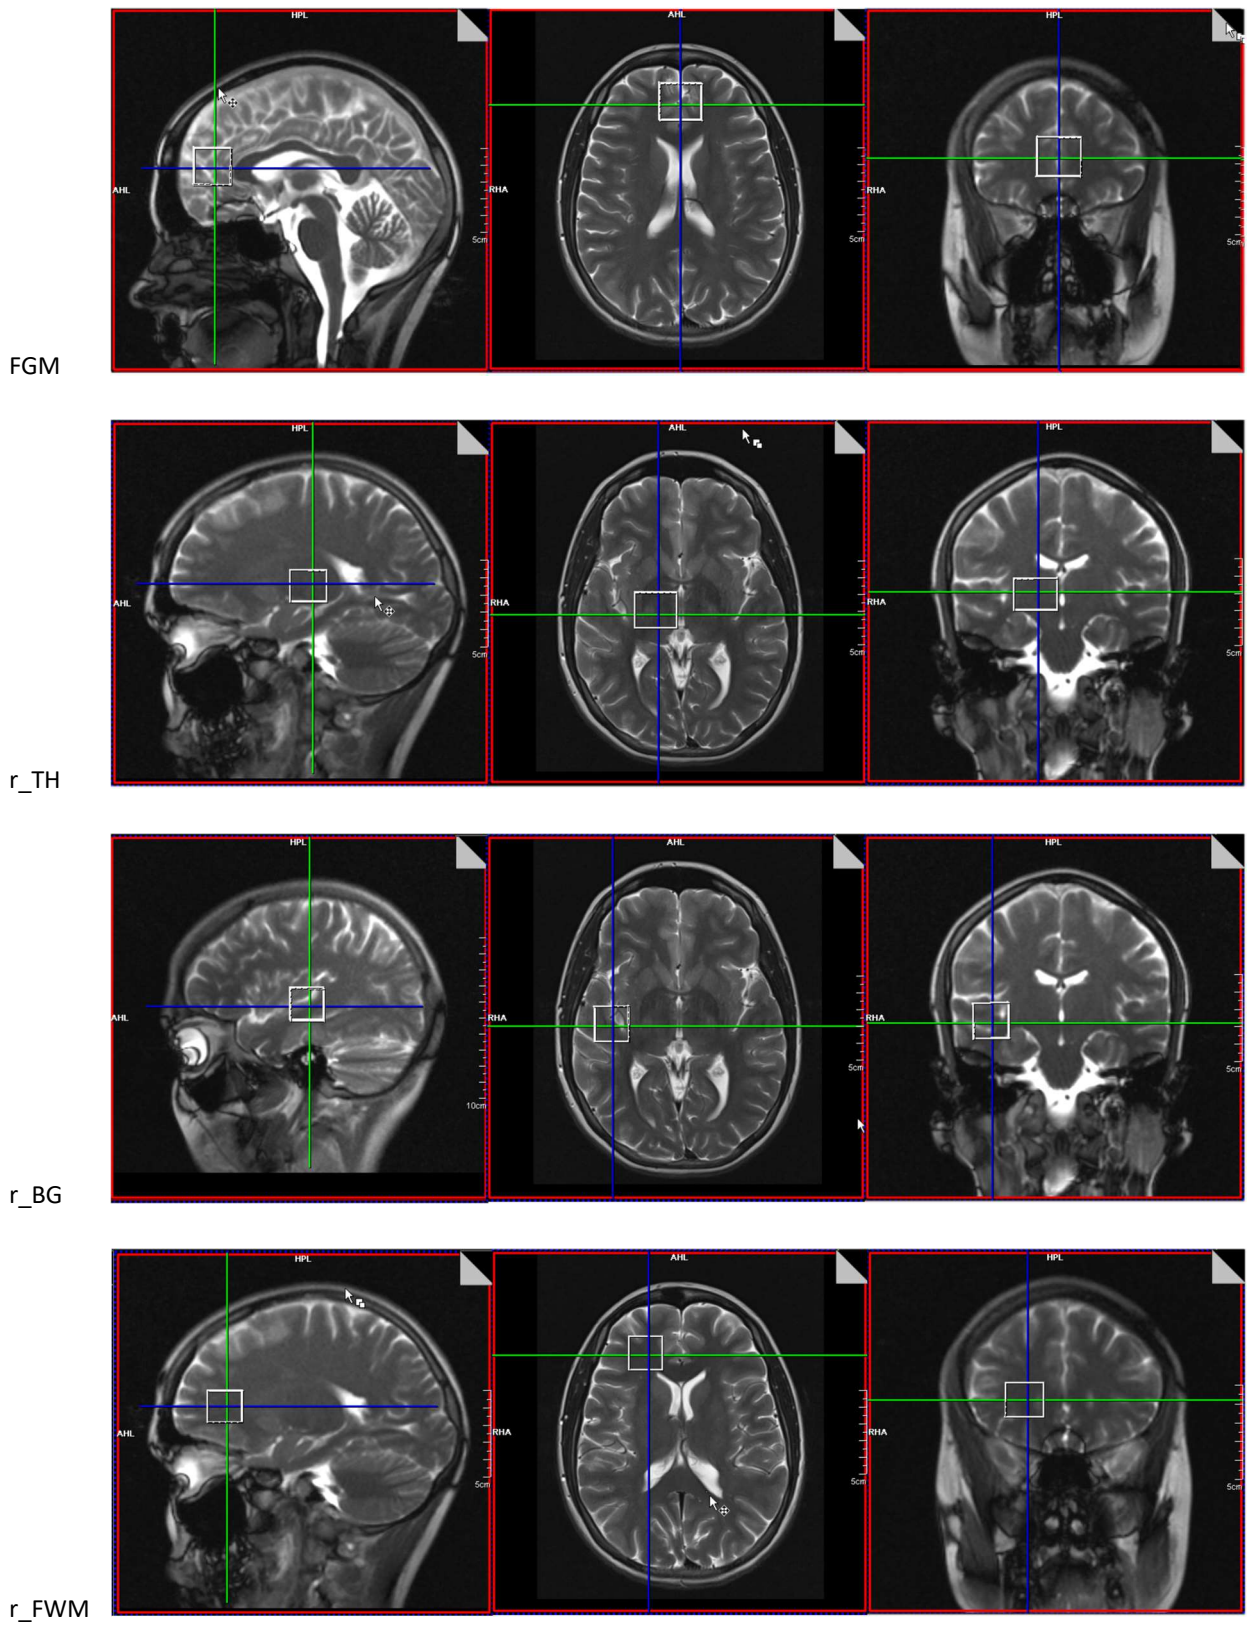

Graphical examples of voxel placement for Proton MRS for each VOI

# Suppl\_Fig6: Evaluation of Proton Spectra – examples

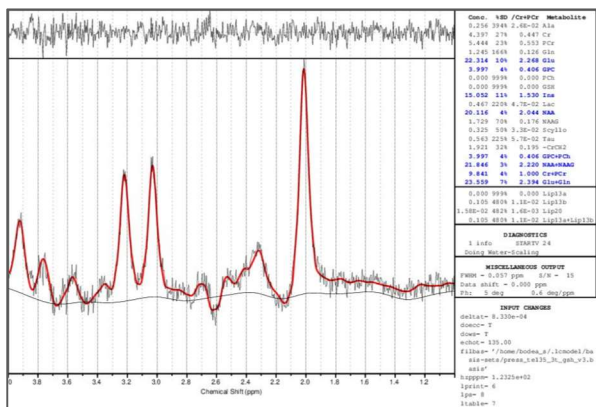

FGM

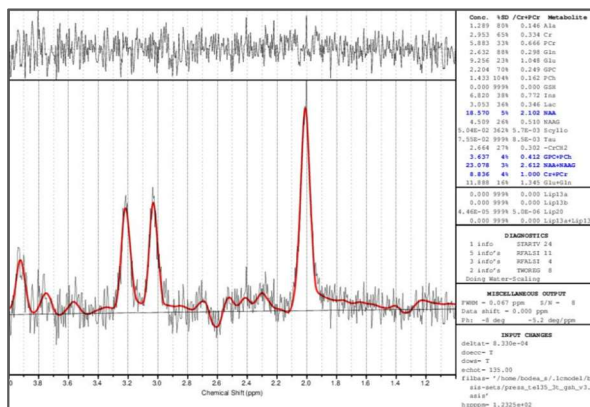

r\_TH

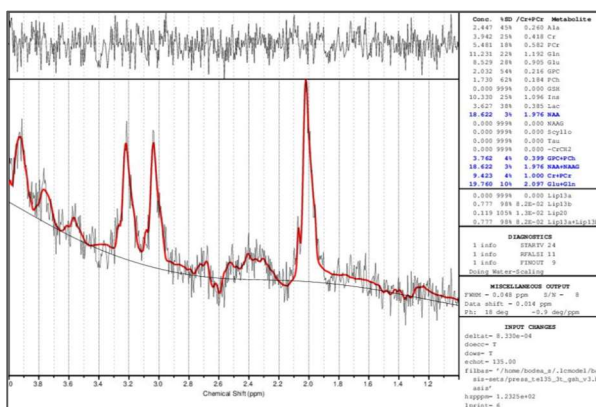

r\_TL

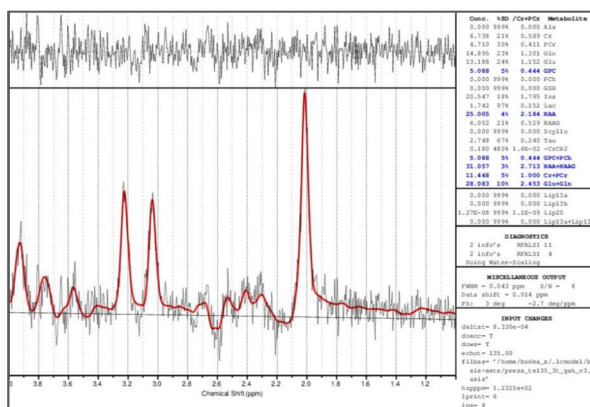

r\_FWM

Representative proton spectra from each VOI with metabolite fit using LCModel software

**Suppl\_Table3: Proton MRS Data Quality - spreadsheet**

|               | voxel size (ml) |                |                |
|---------------|-----------------|----------------|----------------|
| mean $\pm$ SD | fN              | mN             | mC             |
| FGM           | 14.8 $\pm$ 1.4  | 15.2 $\pm$ 0.9 | 14.5 $\pm$ 1.4 |
| r_TH          | 12.0 $\pm$ 1.2  | 12.0 $\pm$ 0.9 | 11.9 $\pm$ 0.9 |
| r_TL          | 9.9 $\pm$ 0.3   | 10.0 $\pm$ 0.1 | 9.9 $\pm$ 0.4  |
| r_FWM         | 7.6 $\pm$ 0.9   | 7.6 $\pm$ 0.6  | 7.6 $\pm$ 0.6  |

|               | SNR            |               |               |
|---------------|----------------|---------------|---------------|
| mean $\pm$ SD | fN             | mN            | mC            |
| FGM           | 11.0 $\pm$ 2.5 | 7.9 $\pm$ 3.0 | 8.3 $\pm$ 2.0 |
| r_TH          | 5.5 $\pm$ 1.9  | 4.7 $\pm$ 1.8 | 4.8 $\pm$ 1.3 |
| r_TL          | 6.8 $\pm$ 2.2  | 5.6 $\pm$ 2.2 | 5.5 $\pm$ 1.5 |
| r_FWM         | 6.2 $\pm$ 3.0  | 5.5 $\pm$ 2.6 | 5.3 $\pm$ 1.6 |

|               | water line width (Hz) |                |               |
|---------------|-----------------------|----------------|---------------|
| mean $\pm$ SD | fN                    | mN             | mC            |
| FGM           | 6.5 $\pm$ 1.7         | 7.2 $\pm$ 2.5  | 6.9 $\pm$ 1.7 |
| r_TH          | 10.0 $\pm$ 1.9        | 10.2 $\pm$ 2.1 | 9.7 $\pm$ 1.7 |
| r_TL          | 7.2 $\pm$ 2.4         | 7.5 $\pm$ 1.7  | 7.9 $\pm$ 1.8 |
| r_FWM         | 7.7 $\pm$ 2.1         | 7.8 $\pm$ 1.9  | 8.0 $\pm$ 2.1 |

Mean values and standard deviation of voxel size, SNR and water line width of proton spectra in each VOI for the three subject groups

Suppl\_Fig7: Proton MRS Data Quality – bar plot

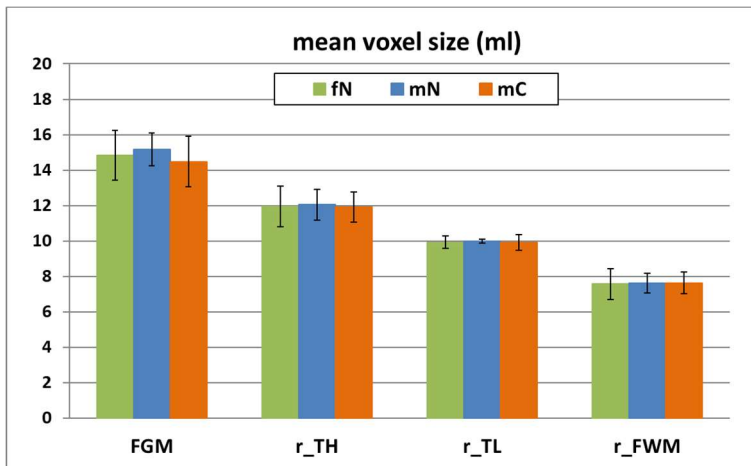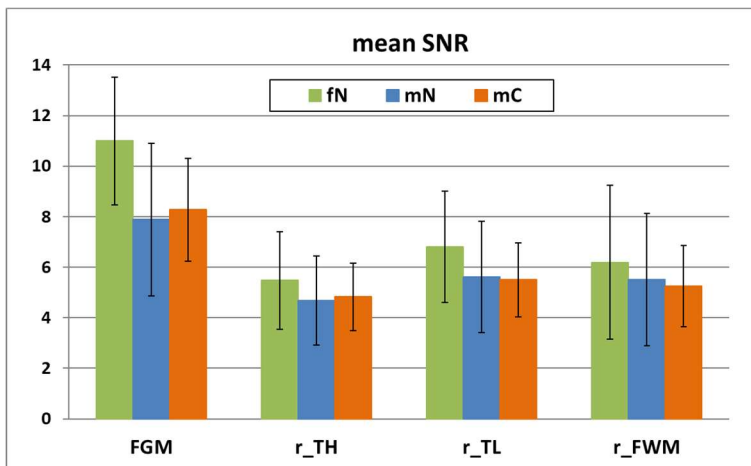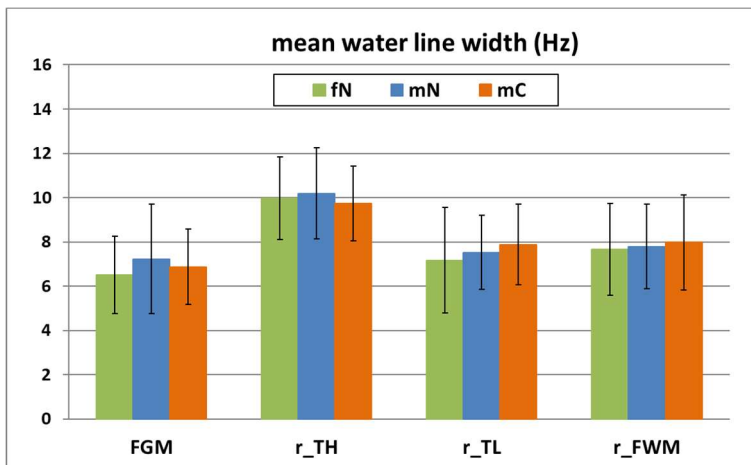

Comparison of mean values of voxel size, SNR and water line width of proton spectra in each VOI for the three subject groups

Suppl\_Fig8: Proton MRS Data Quality – box plot

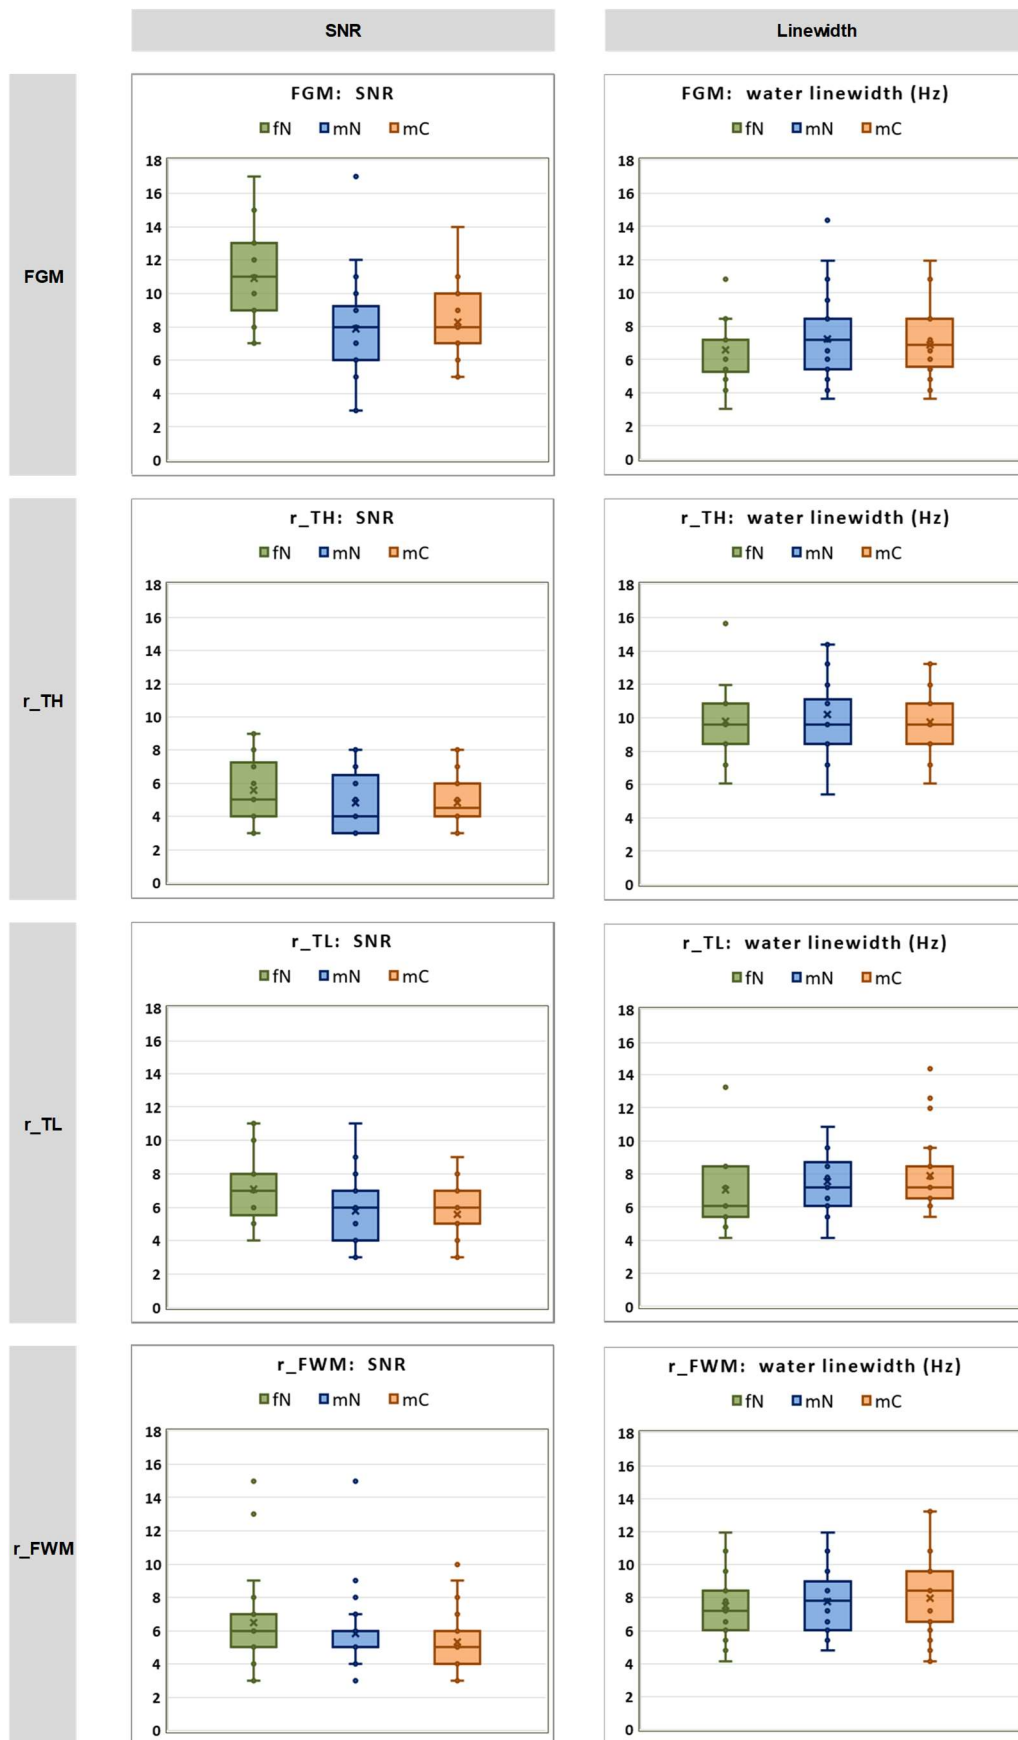

Box plots for SNR and water line width of proton spectra in each VOI for the three subject groups
