# Supplementary material for: Impact of cannabis use on brain metabolism using 31P and 1H magnetic resonance spectroscopy
Source: Springer Nature journal article supplement (doi:10.1007/s00234-023-03220-y), 2023-09-22
Supplement: MOESM5 [file 234_2023_3220_MOESM5_ESM.pdf]

# Impact of cannabis use on brain metabolism using <sup>31</sup>P and <sup>1</sup>H magnetic resonance spectroscopy

Maximilian Fenzl<sup>1</sup> (ORCID 0000-0003-1011-2754) · Martin Backens<sup>1</sup> (ORCID 0000-0002-3414-696X) · Silviu Bodea<sup>2</sup> · Miriam Wittemann<sup>3</sup> · Florian Werler<sup>4</sup> · Jule Brielmaier<sup>5</sup> · Robert Christian Wolf<sup>4</sup> (ORCID 0000-0002-5358-5212) · Wolfgang Reith<sup>1</sup>

1. Institute of Neuroradiology, Saarland University, 66421 Homburg, Germany
2. Helmholtz Zentrum Munich, German Research Center for Environmental Health Institute of Biological and Medical Imaging, 85748 Munich, Germany
3. Department of Psychiatry and Psychotherapy, Saarland University, 66421 Homburg, Germany
4. Department of General Psychiatry at the Center for Psychosocial Medicine, Heidelberg University, 69115 Heidelberg, Germany
5. Department of Obstetrics and Gynecology, RKH Clinic Ludwigsburg, 71640 Ludwigsburg, Germany

**Suppl\_Table6: T1 and T2 relaxation for Proton MRS**

| T1 (ms) | NAA  | Cr   | Cho  | ml   | Glx  | Brain water | CSF  |
|---------|------|------|------|------|------|-------------|------|
| WM      | 1400 | 1300 | 1100 | 1000 | 1100 | 1000        | 4000 |
| GM      | 1500 | 1400 | 1300 | 1000 | 1100 | 1500        | 4000 |

| T2 (ms) | NAA | Cr  | Cho | ml  | Glx | Brain water | CSF  |
|---------|-----|-----|-----|-----|-----|-------------|------|
| WM      | 280 | 150 | 200 | 200 | 180 | 75          | 1500 |
| GM      | 250 | 150 | 230 | 200 | 180 | 95          | 1500 |

T1 and T2 values used for relaxation correction of proton metabolite values

Suppl\_Table7: Results of 1H MRS - Comparison between groups

| FGM             |              | overall comparison of groups (multivariate)       |                           |       |                        |                           |       |                        |
|-----------------|--------------|---------------------------------------------------|---------------------------|-------|------------------------|---------------------------|-------|------------------------|
|                 |              | Statistics MANOVA: Wilks-Lambda: p = 0.047        |                           |       |                        |                           |       |                        |
| omnibus p-value |              | pairwise group comparison (post-hoc Scheffé test) |                           |       |                        |                           |       |                        |
|                 |              | fN (n=21)<br>mean ± SD                            | Δmf<br>rel. diff. p-value |       | mN (n=26)<br>mean ± SD | ΔCN<br>rel. diff. p-value |       | mC (n=40)<br>mean ± SD |
| tNAA            | 0.728        | 22.6 ± 3.5                                        | 1%                        | 0.990 | 22.7 ± 3.1             | -3%                       | 0.759 | 22.1 ± 3.0             |
| tCr             | 0.484        | 15.5 ± 2.4                                        | 4%                        | 0.651 | 16.1 ± 2.8             | 1%                        | 0.984 | 16.2 ± 1.8             |
| tCho            | <b>0.029</b> | 4.1 ± 0.8                                         | 12%                       | 0.057 | 4.6 ± 0.8              | -1%                       | 0.973 | 4.5 ± 0.5              |

| r_TH            |       | overall comparison of groups (multivariate)       |                           |       |                        |                           |       |                        |
|-----------------|-------|---------------------------------------------------|---------------------------|-------|------------------------|---------------------------|-------|------------------------|
|                 |       | Statistics MANOVA: Wilks-Lambda: p = 0.455        |                           |       |                        |                           |       |                        |
| omnibus p-value |       | pairwise group comparison (post-hoc Scheffé test) |                           |       |                        |                           |       |                        |
|                 |       | fN (n=20)<br>mean ± SD                            | Δmf<br>rel. diff. p-value |       | mN (n=25)<br>mean ± SD | ΔCN<br>rel. diff. p-value |       | mC (n=39)<br>mean ± SD |
| tNAA            | 0.495 | 13.5 ± 1.9                                        | 2%                        | 0.886 | 13.7 ± 2.3             | -4%                       | 0.500 | 13.1 ± 1.8             |
| tCr             | 0.450 | 7.9 ± 1.3                                         | 5%                        | 0.459 | 8.3 ± 1.1              | -3%                       | 0.712 | 8.1 ± 1.0              |
| tCho            | 0.204 | 2.4 ± 0.3                                         | 8%                        | 0.205 | 2.6 ± 0.4              | -3%                       | 0.610 | 2.5 ± 0.3              |

| r_TL            |       | overall comparison of groups (multivariate)       |                           |       |                        |                           |       |                        |
|-----------------|-------|---------------------------------------------------|---------------------------|-------|------------------------|---------------------------|-------|------------------------|
|                 |       | Statistics MANOVA: Wilks-Lambda: p = 0.480        |                           |       |                        |                           |       |                        |
| omnibus p-value |       | pairwise group comparison (post-hoc Scheffé test) |                           |       |                        |                           |       |                        |
|                 |       | fN (n=20)<br>mean ± SD                            | Δmf<br>rel. diff. p-value |       | mN (n=25)<br>mean ± SD | ΔCN<br>rel. diff. p-value |       | mC (n=39)<br>mean ± SD |
| tNAA            | 0.508 | 15.8 ± 3.1                                        | -3%                       | 0.853 | 15.4 ± 2.9             | -3%                       | 0.846 | 15.0 ± 2.3             |
| tCr             | 0.947 | 10.0 ± 2.0                                        | -1%                       | 0.972 | 9.9 ± 1.9              | 2%                        | 0.950 | 10.0 ± 1.9             |
| tCho            | 0.606 | 2.9 ± 0.7                                         | 7%                        | 0.640 | 3.1 ± 0.6              | -1%                       | 0.978 | 3.0 ± 0.7              |

| r_FWM           |       | overall comparison of groups (multivariate)       |                           |       |                        |                           |       |                        |
|-----------------|-------|---------------------------------------------------|---------------------------|-------|------------------------|---------------------------|-------|------------------------|
|                 |       | Statistics MANOVA: Wilks-Lambda: p = 0.593        |                           |       |                        |                           |       |                        |
| omnibus p-value |       | pairwise group comparison (post-hoc Scheffé test) |                           |       |                        |                           |       |                        |
|                 |       | fN (n=19)<br>mean ± SD                            | Δmf<br>rel. diff. p-value |       | mN (n=23)<br>mean ± SD | ΔCN<br>rel. diff. p-value |       | mC (n=39)<br>mean ± SD |
| tNAA            | 0.244 | 14.7 ± 1.6                                        | 4%                        | 0.451 | 15.3 ± 1.7             | -4%                       | 0.272 | 14.7 ± 1.2             |
| tCr             | 0.385 | 8.2 ± 1.0                                         | 5%                        | 0.480 | 8.6 ± 1.1              | 0%                        | 0.997 | 8.5 ± 1.0              |
| tCho            | 0.791 | 2.7 ± 0.5                                         | 3%                        | 0.795 | 2.8 ± 0.4              | -1%                       | 0.962 | 2.8 ± 0.4              |

Absolute mean concentration values ± standard deviation of tNAA, tCr and tCho are given as mmol/kg brain tissue.

Δmf indicates the relative difference of metabolite values between fN and mN:  $\Delta mf = \frac{(mN - fN)}{fN}$ .

ΔCN indicates the relative difference of metabolite values between mN and mC:  $\Delta CN = \frac{(mC - mN)}{mN}$ .

The Wilks-Lambda test reflects the overall effect of the three groups on all three metabolite values included in the MANOVA. Post-hoc Scheffé test was used for paired comparison of groups.

p-values < 0.05 are marked in bold.

Suppl\_Fig10a: Results of Proton MRS: concentration values - box plot

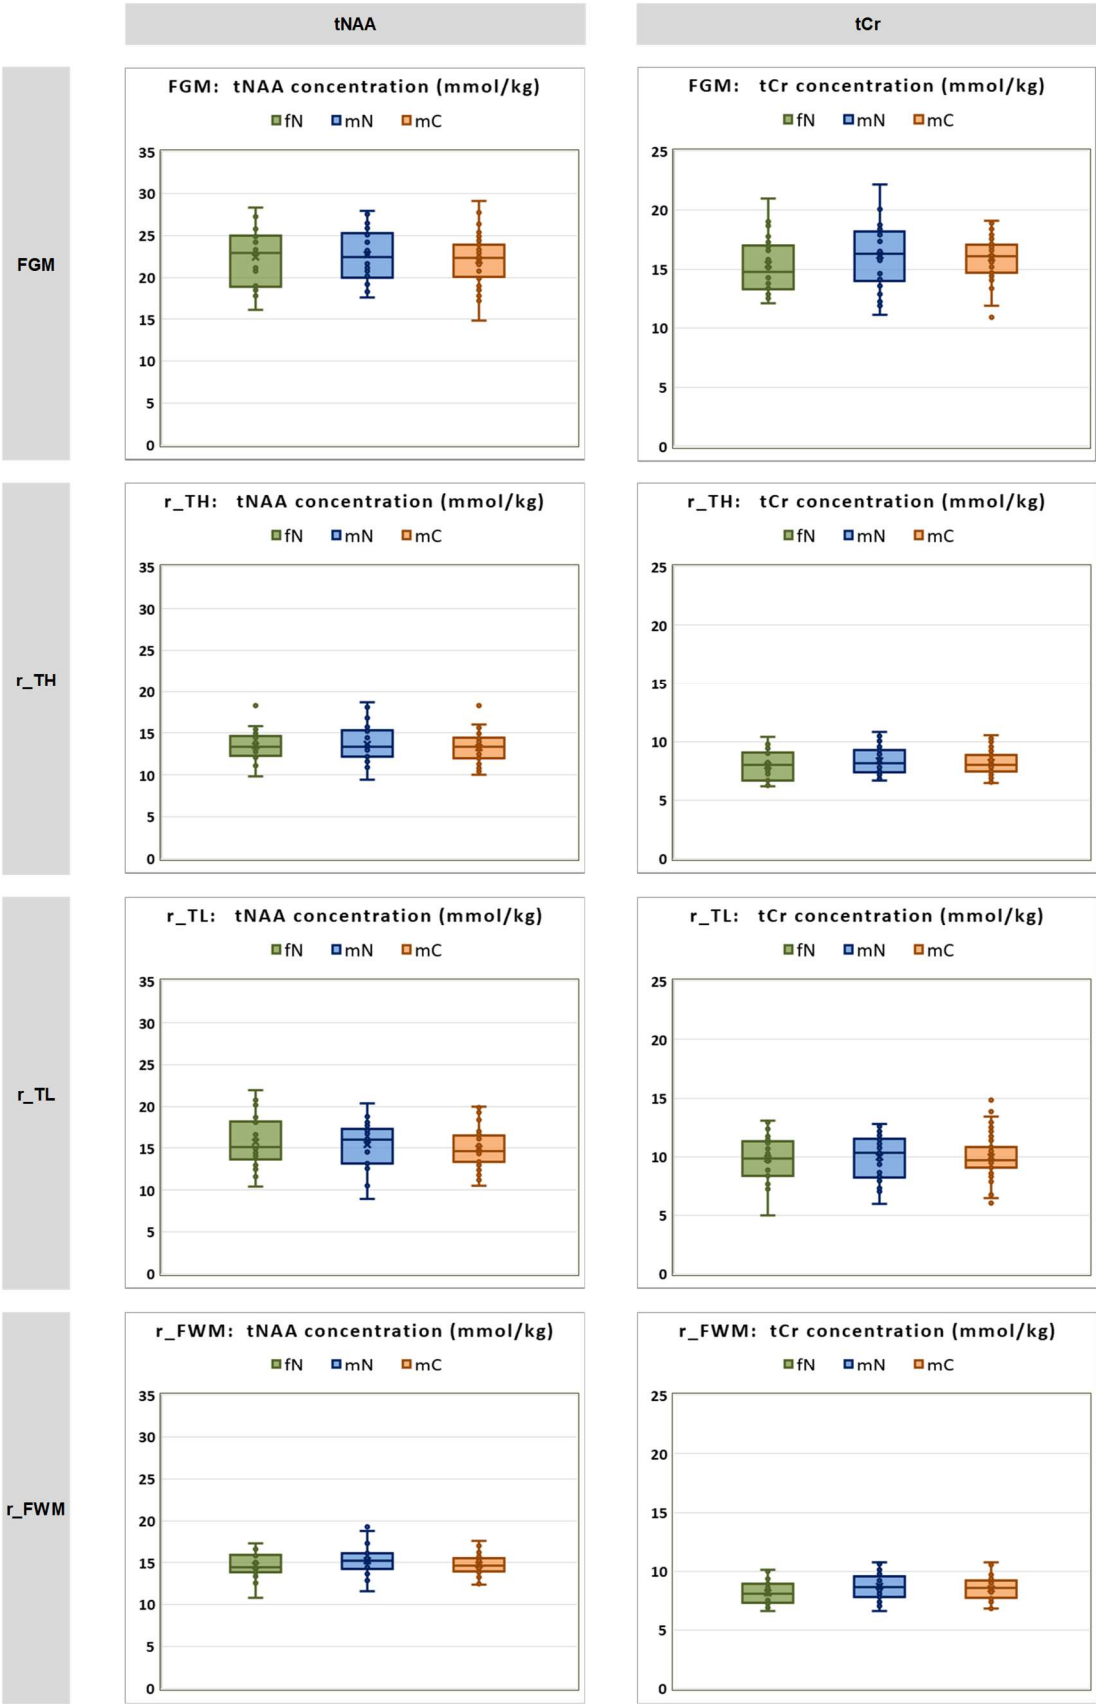

Box plots describing the variation of absolute metabolite concentration values of tNAA and tCr in four different regions of the brain. Asterisk marks significant differences (p < 0.05).

Suppl\_Fig10b: Results of Proton MRS: concentration values - box plot

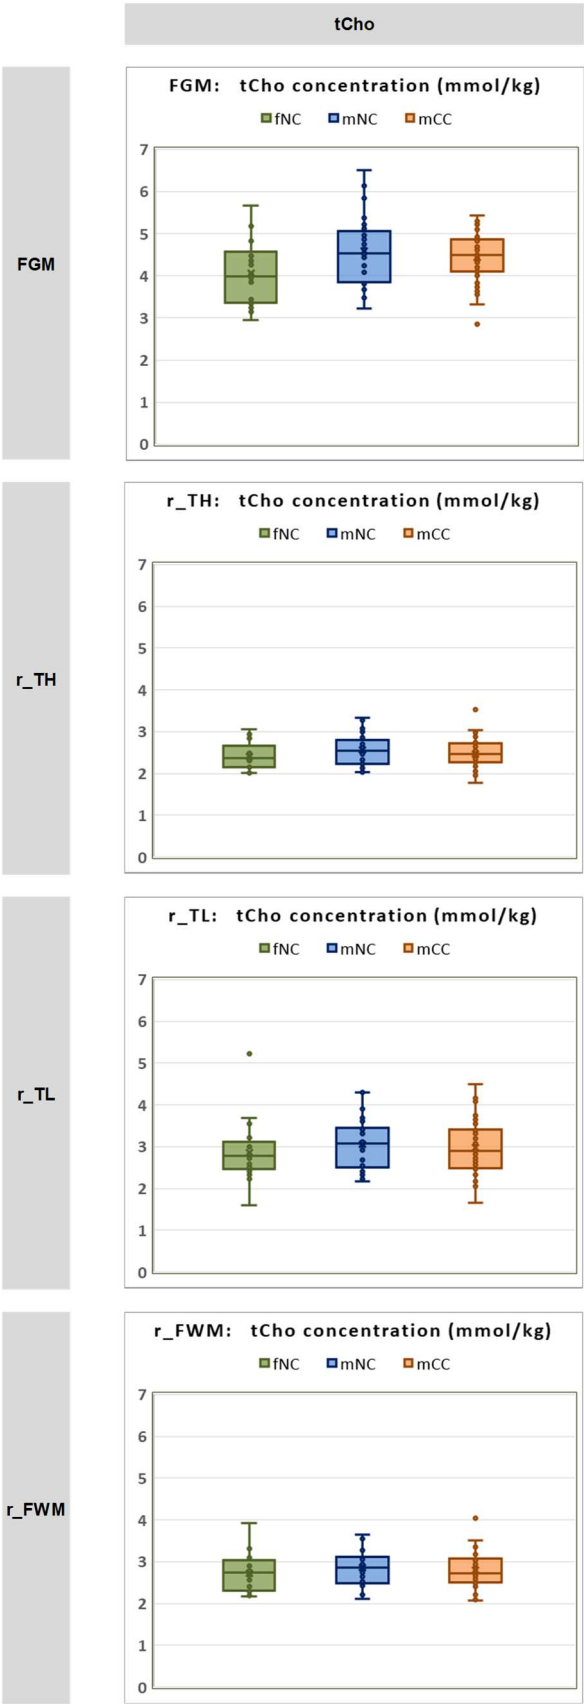

Box plots describing the variation of absolute metabolite concentration values of tCho in four different regions of the brain. Asterisk marks significant differences (p < 0.05).

**Suppl\_Table8: Calculated ratio of concentrations PCr/Cr**

| PCr/Cr       | pairwise group comparison (t-test) |                           |              |                 |                           |       |                 |
|--------------|------------------------------------|---------------------------|--------------|-----------------|---------------------------|-------|-----------------|
|              | fN<br>mean ± SD                    | Δmf<br>rel. diff. p-value |              | mN<br>mean ± SD | ΔCN<br>rel. diff. p-value |       | mC<br>mean ± SD |
| <b>FGM</b>   | 0.32 ± 0.09                        | -3%                       | 0.695        | 0.31 ± 0.10     | -6%                       | 0.451 | 0.29 ± 0.06     |
| <b>r_TH</b>  | 1.01 ± 0.47                        | -32%                      | <b>0.010</b> | 0.68 ± 0.28     | 16%                       | 0.160 | 0.79 ± 0.33     |
| BG           | -                                  |                           |              | -               |                           |       | -               |
| <b>r_TL</b>  | 0.79 ± 0.23                        | 15%                       | 0.362        | 0.90 ± 0.57     | -6%                       | 0.678 | 0.85 ± 0.35     |
| <b>r_FWM</b> | 0.73 ± 0.19                        | -3%                       | 0.696        | 0.70 ± 0.21     | -3%                       | 0.723 | 0.68 ± 0.19     |

Ratio of PCr and Cr concentrations. Cr concentration was obtained by:  $[Cr] = [tCr] - [PCr]$ .
